# Supplementary material
Source: PubMed Central journal article supplement (PMC2696143)
Supplement: rsif20080417s02.pdf [file rsif20080417s02.pdf]

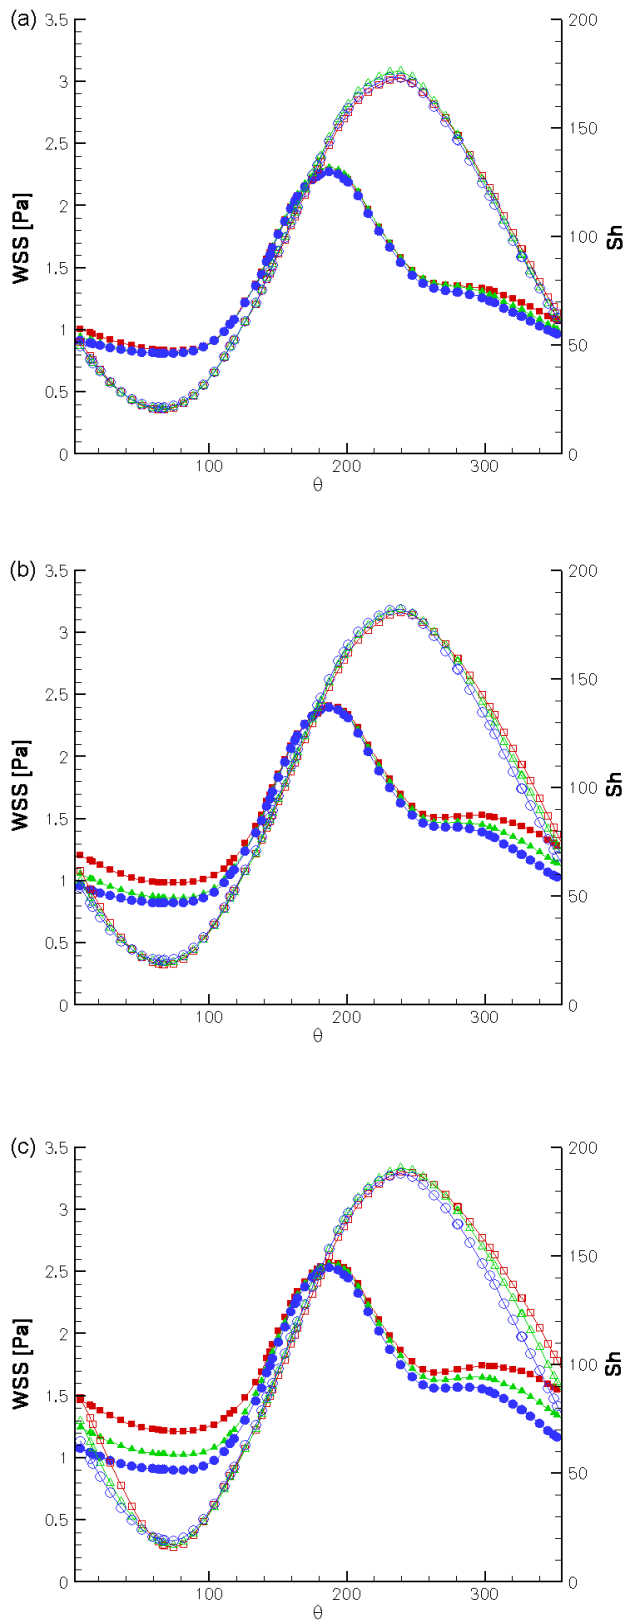

Figure 13. Time-averaged WSS (filled symbols) and Sh (open symbols) number profiles along the circumference of the proximal section and (a)  $A=0.66$ , (b)  $A=1$  and (c)  $A=1.33$ . Squares,  $T=0.5$  s; triangles,  $T=0.8$  s; circles,  $T=1.33$  s.
