# Supplementary material
Source: PubMed Central journal article supplement (PMC2696143)
Supplement: rsif20080417s03.pdf [file rsif20080417s03.pdf]

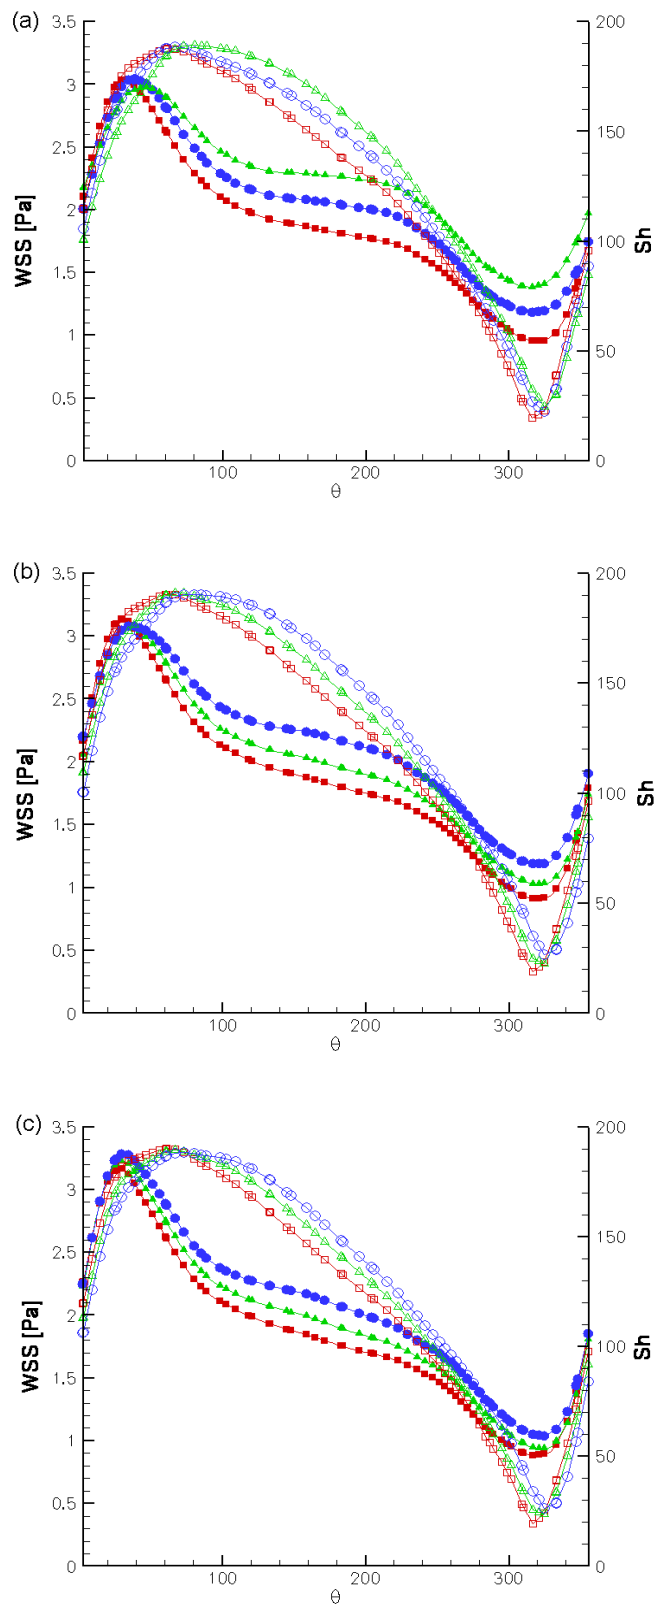

Figure 14. Time-averaged WSS (filled symbols) and Sh (open symbols) number profiles along the circumference of the middle section and (a)  $T=0.5$  s, (b)  $T=0.8$  s and (c)  $T=1.33$  s. Squares,  $A=0.66$ ; triangles,  $A=1$ ; circles,  $A=1.33$ .
